# Supplementary material for: Thermal Conductivity and Flash Temperature
Source: Springer Nature journal article supplement (doi:10.1007/s11249-018-1133-8), 2019-01-07
Supplement: MOESM1 [file 16383386]

**Thermal conductivity and flash temperature - Supplementary Information**

This document presents the raw data used to obtain the thermal conductivity of the specimens tested.

Figures 1 to 7 show the phase vs. modulation frequency data and fitting for each of the specimens tested.

Fig. 1: Data Phase vs. frequency data from five locations on the undoped silicon wafer sample. Sample data (red circles) and best model fit (blue line) for one of the locations on the Si sample. Red and green lines show the model solutions obtained by varying the thermal conductivity by ±20%.

Fig. 2: Data Phase vs. frequency data from five locations on the germanium wafer sample. Sample data (red circles) and best model fit (blue line) for one of the locations on the Si sample. Red and green lines show the model solutions obtained by varying the thermal conductivity by ±20%.

Fig. 3: Data Phase vs. frequency data from five locations on the zirconia ball sample. Sample data (red circles) and best model fit (blue line) for one of the locations on the Si sample. Red and green lines show the model solutions obtained by varying the thermal conductivity by ±20%.

Fig. 4: Data Phase vs. frequency data from five locations on the WC ball sample. Sample data (red circles) and best model fit (blue line) for one of the locations on the Si sample. Red and green lines show the model solutions obtained by varying the thermal conductivity by ±20%.

Fig. 5: Data Phase vs. frequency data from five locations on the WC disc sample. Sample data (red circles) and best model fit (blue line) for one of the locations on the Si sample. Red and green lines show the model solutions obtained by varying the thermal conductivity by ±20%.

Fig. 6: Data Phase vs. frequency data from five locations on the steel ball sample. Sample data (red circles) and best model fit (blue line) for one of the locations on the Si sample. Red and green lines show the model solutions obtained by varying the thermal conductivity by ±20%.

Fig. 6: Data Phase vs. frequency data from five locations on the steel disc sample. (b) Sample data (red circles) and best model fit (blue line) for one of the locations on the Si sample. Red and green lines show the model solutions obtained by varying the thermal conductivity by ±20%.

Fig. 7: Data Phase vs. frequency data from five locations on the Si3N4 sample. Sample data (red circles) and best model fit (blue line) for one of the locations on the Si sample. Red and green lines show the model solutions obtained by varying the thermal conductivity by ±20%.

The uncertainty of the data-fitting process was explored using a Monte Carlo simulation of the data fitting process, assuming typical uncertainty in the known model parameters (gold coating thickness, heat capacity and thermal conductivity). Results for the volumetric heat capacity and thermal conductivity of the silicon, germanium, zirconia and silicon nitride samples are shown in figures 8 to 11.

Fig. 8: Monte Carlo results of the data fitting process for silicon from 1000 iterations, a) Thermal conductivity, b) Specific Heat.

Fig. 9: Monte Carlo results of the data fitting process for germanium from 1000 iterations, a) Thermal conductivity, b) Specific Heat.

Fig. 10: Monte Carlo results of the data fitting process for zirconia from 1000 iterations, a) Thermal conductivity, b) Specific Heat.

Fig. 11: Monte Carlo results of the data fitting process for silicon nitride from 1000 iterations, a) Thermal conductivity, b) Specific Heat.

Figure 12 shows examples of the phase maps, obtained at 138.6 kHz, for the zirconia, tungsten carbide, steel, silicon carbide specimens. The variation in the phase map for the Si3N4 specimen was due to the roughness of the sample (rather than actual variations in thermal conductivity). For this reason, for the Si3N4 sample, the thermal conductivity measurements shown in Table 2 of the paper were made only on the regions of the surface showing sufficient reflectance. These regions are indicated in figure 12e below.

| 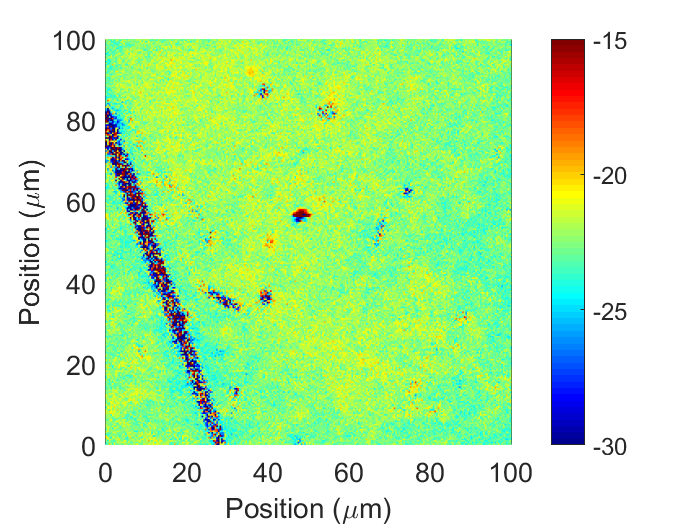 |  |
| --- | --- |
| 1. Zirconia ball | 1. WC ball |
|  |  |
| 1. Steel disc | 1. Steel ball |
| 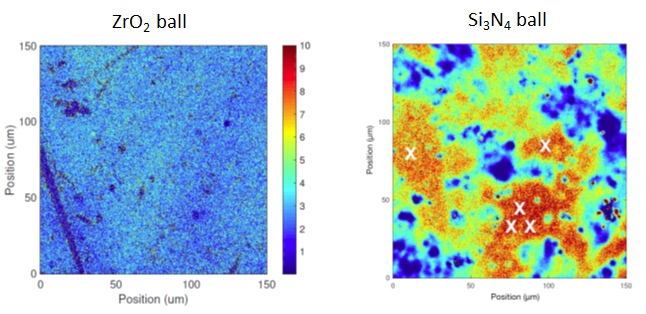 |  |
| 1. Si3N4 |  |

Fig. 12. Phase maps for each sample at 138.6 kHz. Note: the variation in the Si­3­N­4 phase map is due to surface topography and the measurement locations on flat regions of the surface are indicated by the Xs.
